# Supplementary material for: Adverse plasma branched‐chain amino acid profile mirrors fatty muscle degeneration in diabetic heart failure patients
Source: PubMed Central journal article supplement — ESC Heart Fail. 2024 May 29;11(5):2941–53. doi: 10.1002/ehf2.14872 (PMC11424297; doi:10.1002/ehf2.14872), 2024-05-29
Supplement: EHF2-11-2941-s001.pdf [file EHF2-11-2941-s001.pdf]

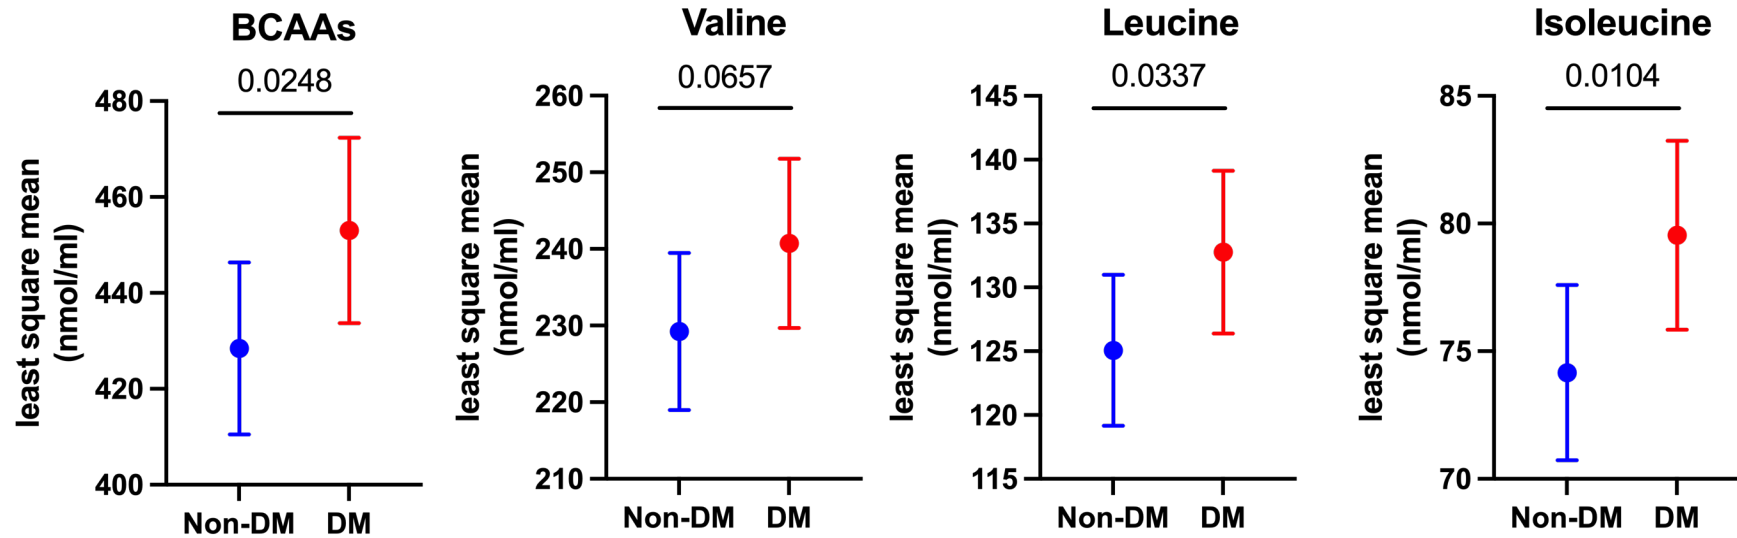

**Supplemental Figure 1.** Comparison of plasma branched-chain amino acid (BCAA) levels by analysis of covariance (ANCOVA) in patients with and those without diabetes (DM), excluding those receiving SGLT2 inhibitors (N=25). Data are presented with the least square mean and 95% confidence interval. Age, gender, NYHA III or IV, ischemic etiology, hypertension, dyslipidemia, and statin use were incorporated into the ANCOVA as potential cofounders. The p values obtained for comparisons of the groups at both ends of the line are shown.
